# Supplementary material
Source: PubMed Central journal article supplement (PMC7796981)
Supplement: NIHMS1614735-supplement-1.pdf [file NIHMS1614735-supplement-1.pdf]

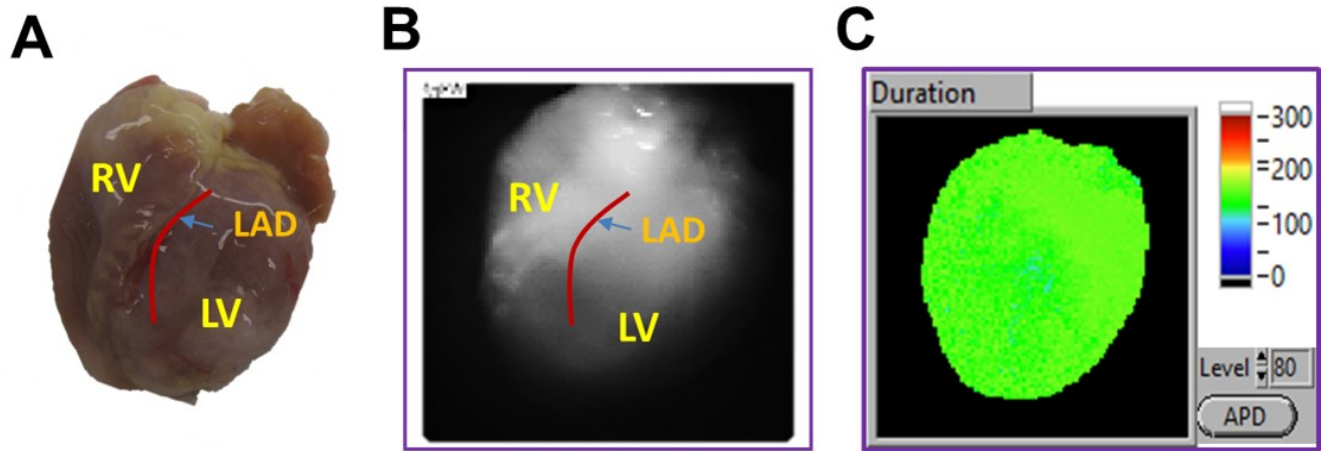

**Online Supplement Figure 1.** Diagram of an *ex vivo* intact heart seen by optical mapping camera. **A**, relative anatomical locations of the right ventricle (RV), the left ventricle (LV) and the left anterior descending artery (LAD). **B**, the preparation under the camera. **C**, an example of APD<sub>80</sub> map in the region of interest. The APD or Ca<sub>i</sub>TD are derived from the average value in the region of interest.

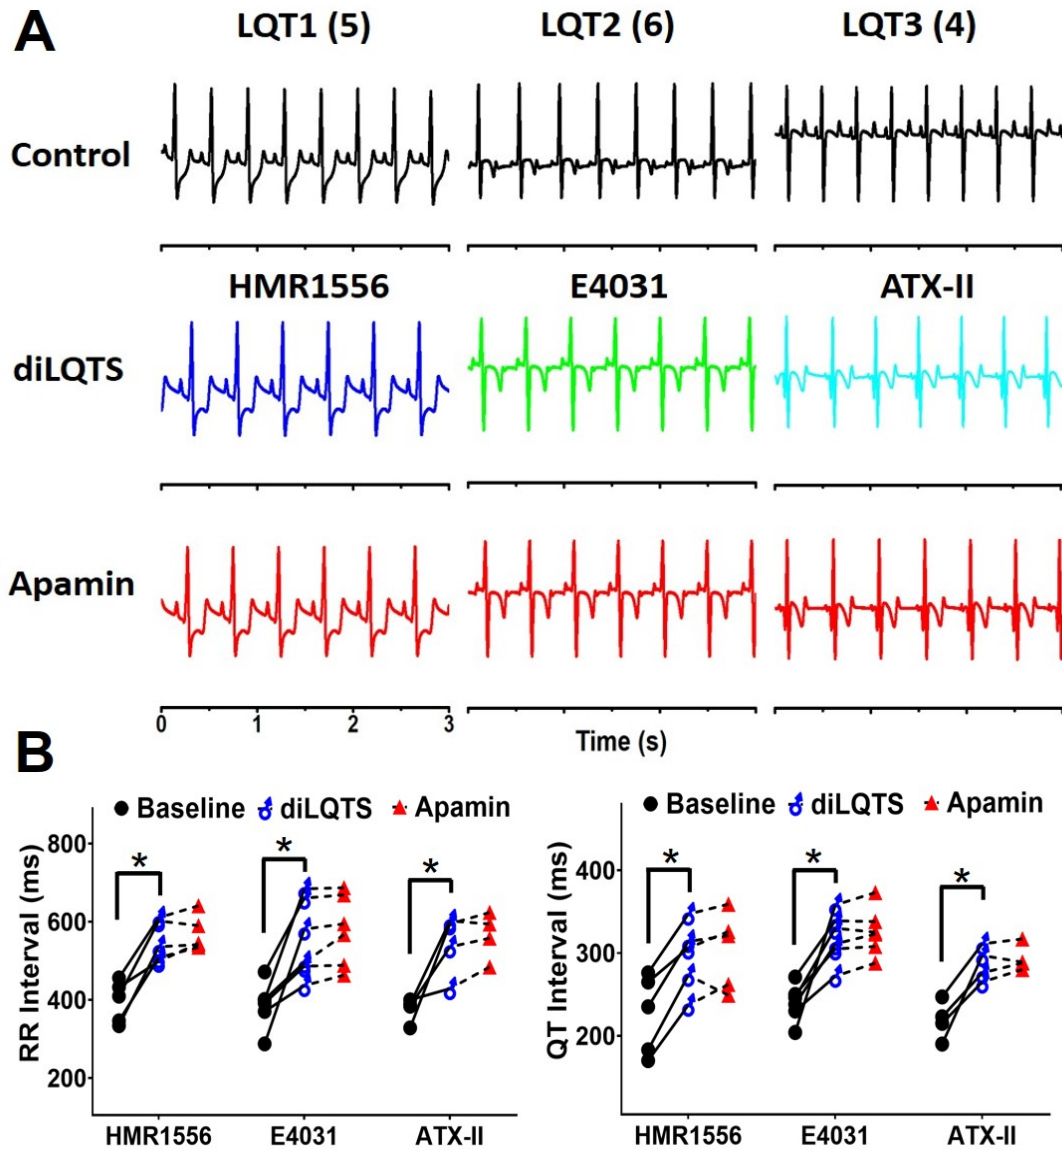

**Online Supplement Figure 2.** Apamin does not further prolong RR and QT intervals in male hearts with diLQTS. We included for analyses male hearts that maintained stable normal sinus rhythm throughout the study. **A** shows representative pseudo ECG traces of diLQT1 (HMR1556, 100 nmol/L), diLQT2 (E4031, 50 nmol/L), and diLQT 3 (ATX-II, 20 nmol/L). Apamin (100 nmol/L) was then given during continued drug infusion. **B**, linkage graphs show the changes of RR and QT intervals in different types of diLQTS. Asterisks indicate significant differences (\*diLQTS compared with baseline;  $p < 0.05$ , each  $n = 4-6$ ).

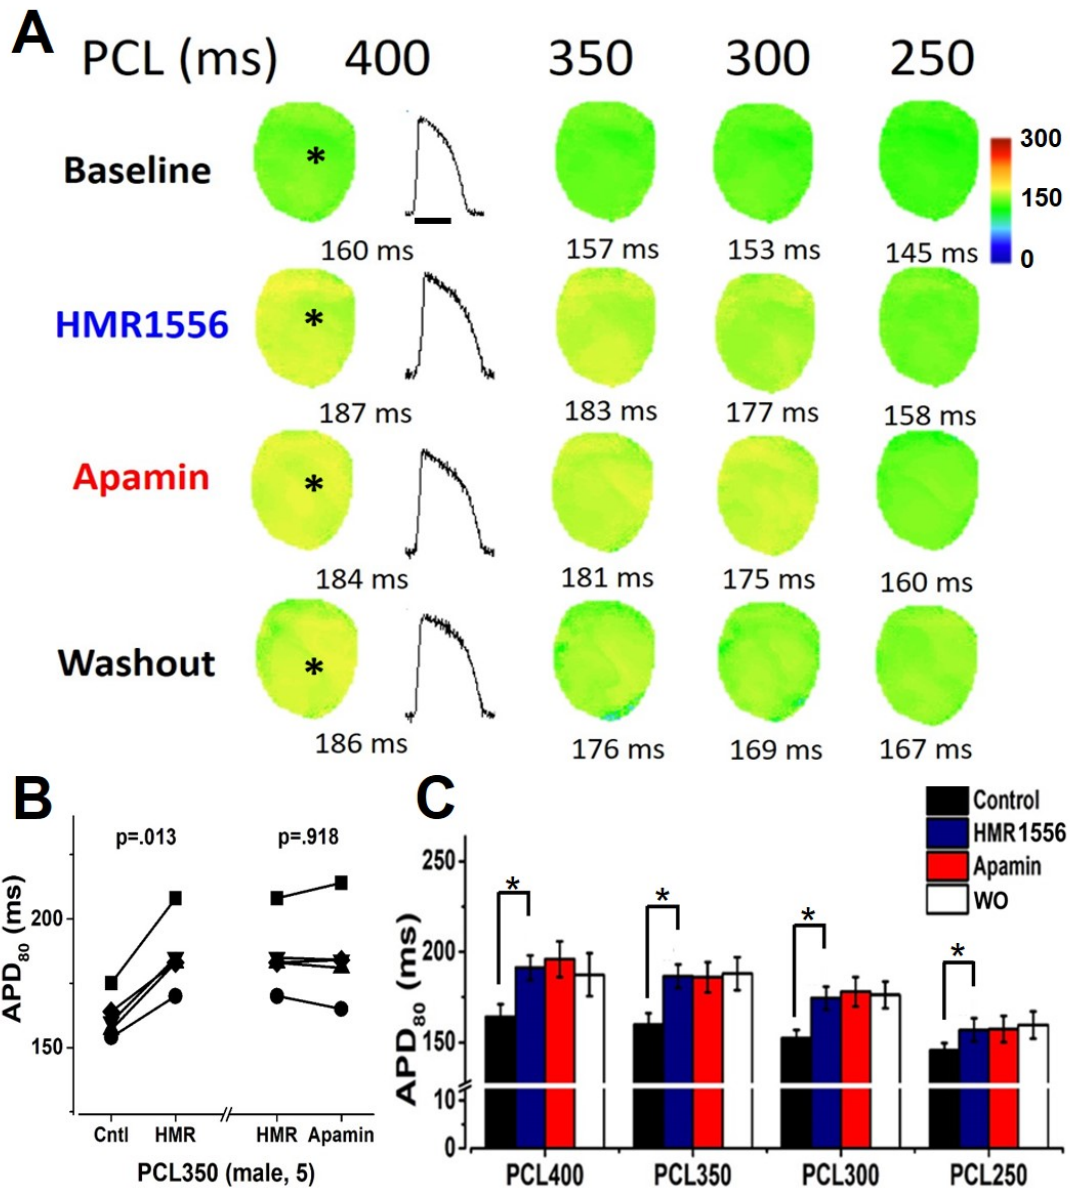

**Online Supplement Figure 3.** Apamin does not further prolong  $APD_{80}$  in male hearts pretreated with HMR1556. **A**, representative membrane potential traces and  $APD_{80}$  maps at baseline and in the presence of HMR1556 (100 nmol/L), after apamin (100 nmol/L), and after washout (Protocol I, diLQT1). **B**, at 350 ms PCL, HMR1556 slightly prolonged  $APD_{80}$  but no further increase of  $APD_{80}$  was observed after apamin. **C**, summary of apamin effects on  $APD_{80}$  at different PCLs in male rabbit ventricles. The apamin effects were not observed at any PCLs. Data presented as mean  $\pm$  SEM. Asterisks indicate significant differences (\*diLQTS compared with baseline;  $p < 0.05$ ,  $n = 5$ ).

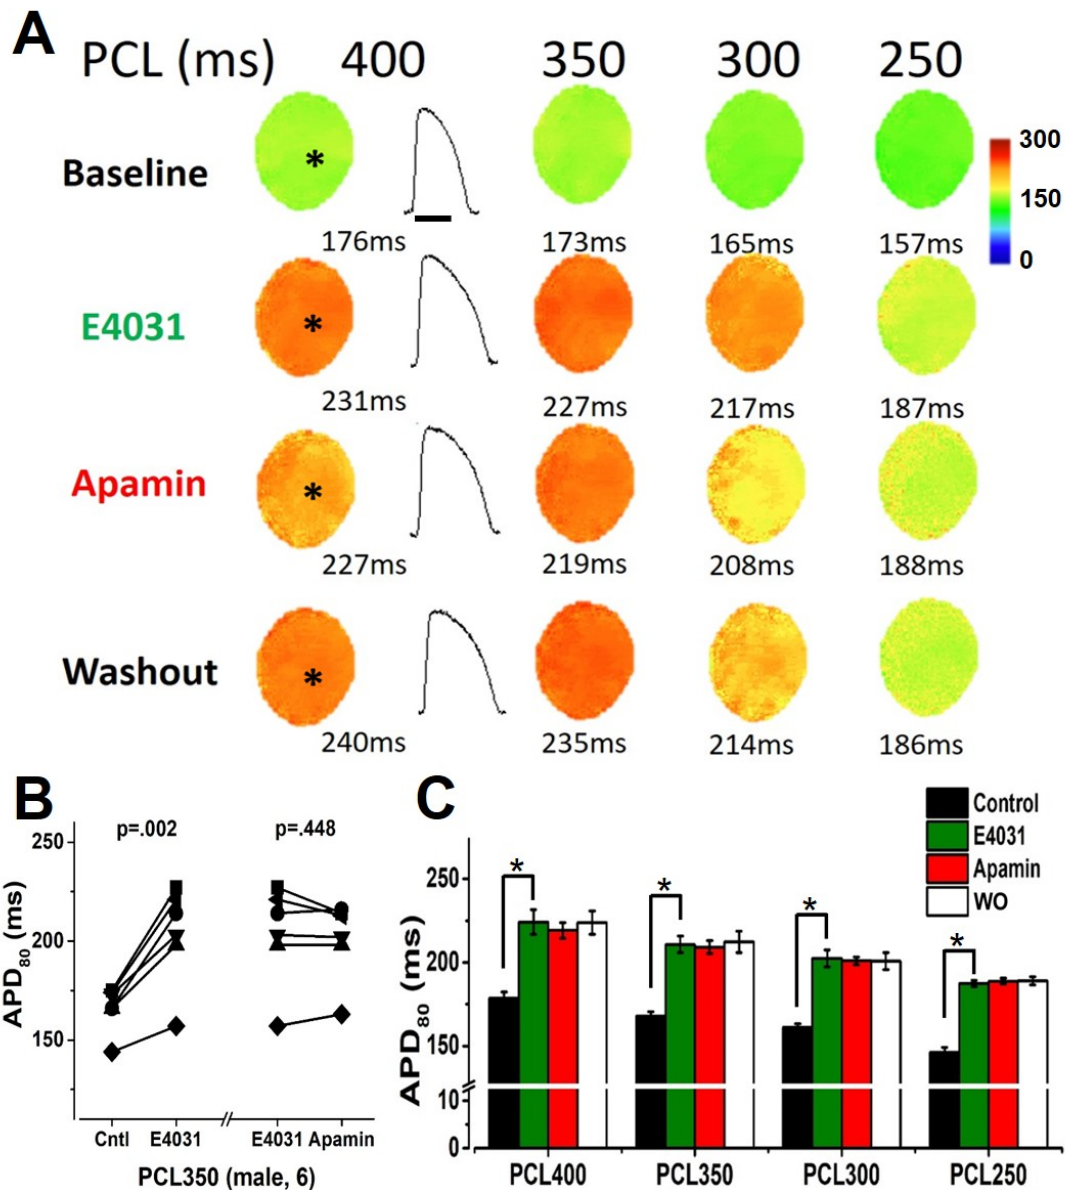

**Online supplement Figure 4.** Apamin does not further prolong  $APD_{80}$  in male hearts pretreated with E4031. **A**, representative membrane potential traces and  $APD_{80}$  maps at baseline and in the presence of E4031 (50 nmol/L), after apamin (100 nmol/L) and after washout (Protocol II, diLQT2). **B**, at 350 ms PCL, E4031 (50 nmol/L) significantly prolonged  $APD_{80}$  but apamin did not cause further  $APD_{80}$  prolongation. **C**, summary of apamin effects on  $APD_{80}$  at different PCLs in male rabbit ventricles. The apamin effects were not observed at any PCLs. Data presented as mean  $\pm$  SEM. Asterisks indicate significant differences (\*diLQTS compared with baseline;  $p < 0.05$ ,  $n = 6$ ).

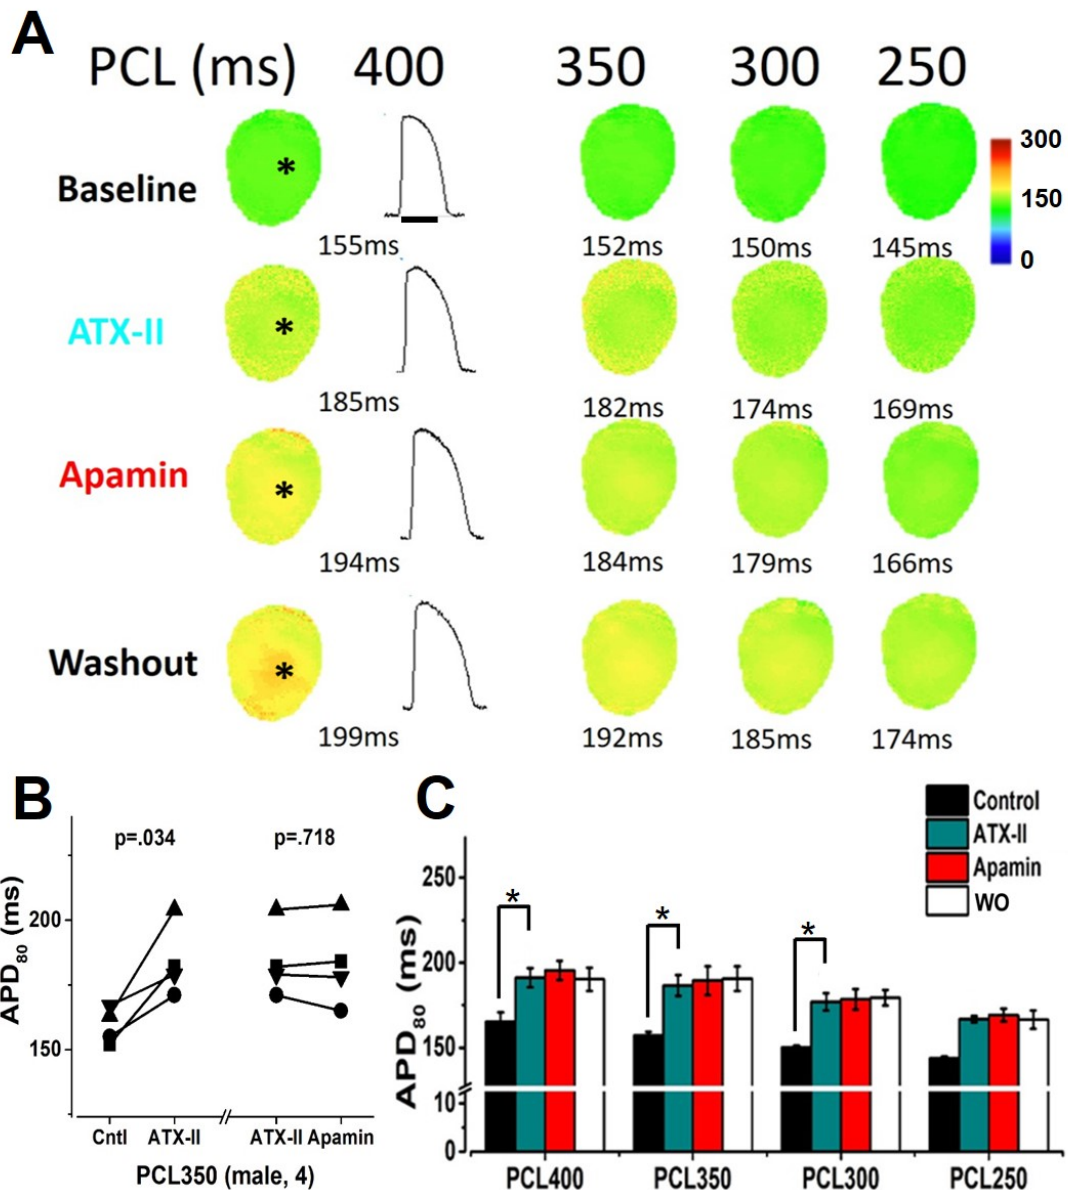

**Online Supplement Figure 5.** Apamin does not further prolong APD<sub>80</sub> in male hearts pretreated with ATXII. **A**, representative membrane potential traces and APD<sub>80</sub> maps at baseline and in the presence of ATX-II (20 nmol/L), after apamin (100 nmol/L), and after washout (Protocol III, diLQT3). **B**, at 350 ms PCL, ATX-II significantly prolonged APD<sub>80</sub> but without further increased APD<sub>80</sub> by apamin. **C**, summary of apamin effects on APD<sub>80</sub> at different PCLs in male rabbit ventricles. The apamin effects were not observed at any PCLs. Data presented as mean  $\pm$  SEM. Asterisks indicate significant differences (\*diLQTS compared with baseline;  $p < 0.05$ ,  $n = 4$ ).

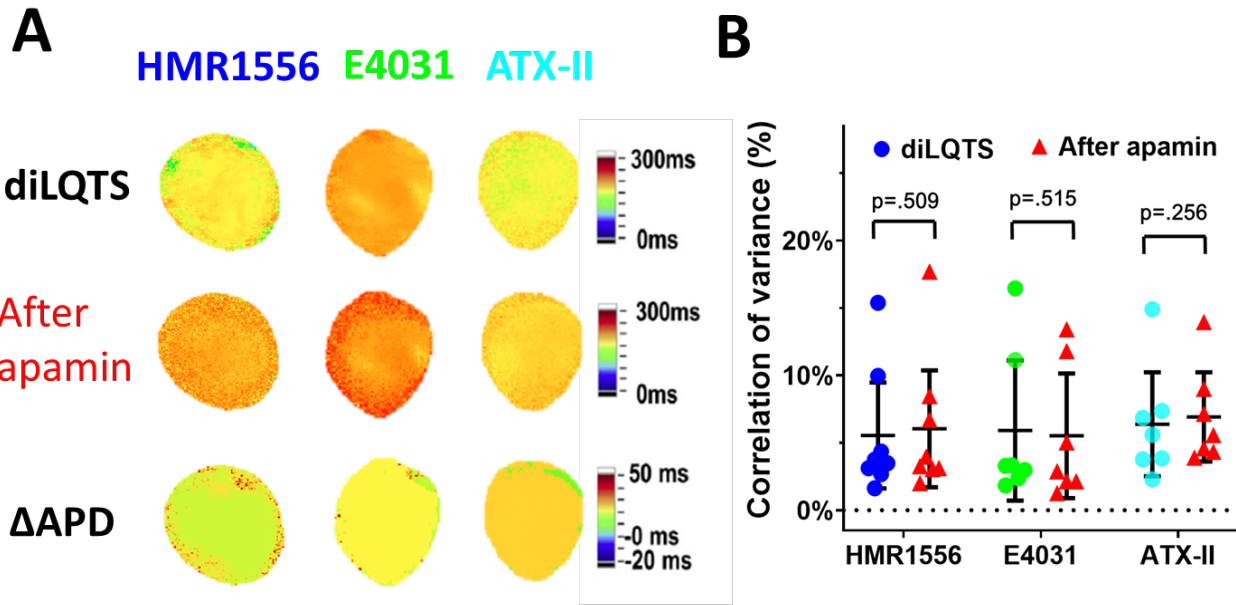

**Online Supplement Figure 6.** Effects of apamin on action potential duration (APD) heterogeneity at PCL350 ms in female diLQTS ventricles. A, representative APD<sub>80</sub> maps at three diLQTS and after adding of apamin (100 nmol/L). The delta APD maps showed no large heterogeneities on the epicardium. B, apamin had no significant effects on the correlation of variance of APD<sub>80</sub> in female diLQTS ventricles.
